# Supplementary material for: DNA methylation changes measured in pre‐diagnostic peripheral blood samples are associated with smoking and lung cancer risk
Source: PubMed Central journal article supplement (PMC5731426; doi:10.1002/ijc.30431), 2016-10-11

### Manhattan Plot

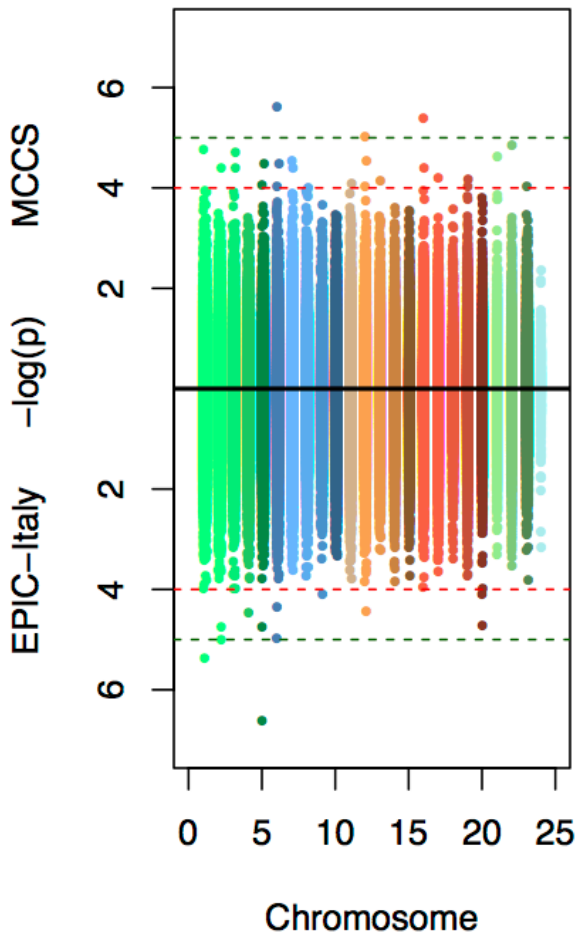

### Top CpGs

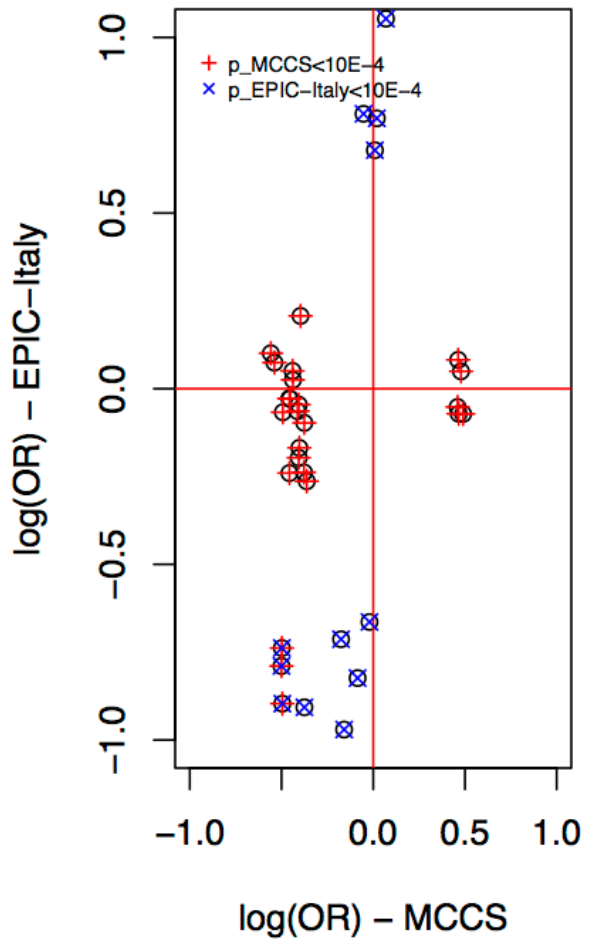

Supplement: IJC-140-50-s003.pdf [file IJC-140-50-s003.pdf]
