# Supplementary material for: DNA methylation changes measured in pre‐diagnostic peripheral blood samples are associated with smoking and lung cancer risk
Source: PubMed Central journal article supplement (PMC5731426; doi:10.1002/ijc.30431), 2016-10-11
Supplement: IJC-140-50-s006.pdf [file IJC-140-50-s006.pdf]

### All top CpGs – EPIC–Italy

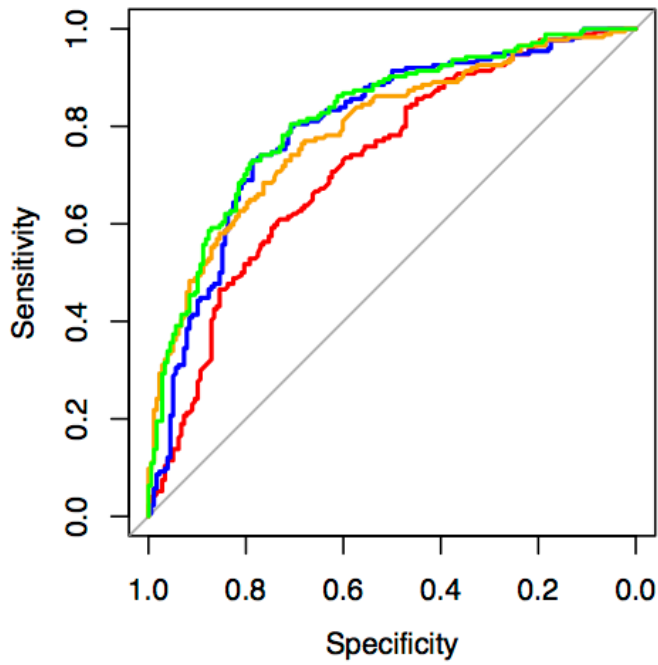

- Mod1~smoke
- Mod2~smoke+M  
AUC(Mod2)–AUC(Mod1)=0.076  
 $p=2.64e-04$
- Mod3~smoke+pckyrs
- Mod4~smoke+pckyrs+M  
AUC(Mod4)–AUC(Mod3)=0.026  
 $p=3.46e-02$

### All top CpGs – MCCS

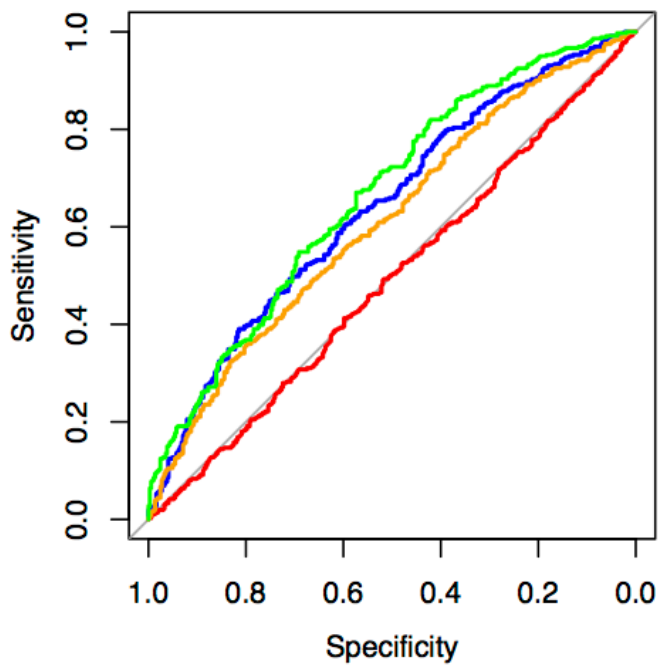

- mod5~smoke
- mod6~smoke+M  
AUCmod6–AUCmod5=0.149  
 $p=5.73e-07$
- mod7~smoke+pckyrs
- mod8~smoke+pckyrs+M  
AUCmod8–AUCmod7m=0.055  
 $p=2.33e-03$
