# Supplementary material for: DNA methylation changes measured in pre‐diagnostic peripheral blood samples are associated with smoking and lung cancer risk
Source: PubMed Central journal article supplement (PMC5731426; doi:10.1002/ijc.30431), 2016-10-11
Supplement: IJC-140-50-s007.pdf [file IJC-140-50-s007.pdf]

**Supplementary Table 1:** OR of lung cancer for 1SD methylation level in each CpG without and with adjustment for cell count according to the method proposed by Houseman in the 5 studies. For MCCS are presented results for all samples and results for Guthrie Cards (GC).

| CpG        |                             | MCCS             |          |          | MCCS-GC          |          |          | EPIC             |          |          | NOWAC            |          |          | NSHDS            |          |          | Heidelberg       |          |          |
|------------|-----------------------------|------------------|----------|----------|------------------|----------|----------|------------------|----------|----------|------------------|----------|----------|------------------|----------|----------|------------------|----------|----------|
|            |                             | OR (95% CI)      | p        | p lrtest | OR (95% CI)      | p        | p lrtest | OR (95% CI)      | p        | p lrtest | OR (95% CI)      | p        | p lrtest | OR (95% CI)      | p        | p lrtest | OR (95% CI)      | p        | p lrtest |
| cg05951221 | not adjusted for cell count | 0.69 (0.55-0.86) | 9.01E-04 |          | 0.65 (0.49-0.86) | 2.17E-03 |          | 0.4 (0.27-0.61)  | 1.89E-05 |          | 0.6 (0.35-1.02)  | 5.76E-02 |          | 0.54 (0.4-0.72)  | 4.97E-05 |          | 0.64 (0.35-1.18) | 1.54E-01 |          |
|            | adjusted for cell count     | 0.69 (0.55-0.87) | 2.02E-03 | 5.05E-01 | 0.64 (0.48-0.85) | 2.36E-03 | 9.78E-01 | 0.39 (0.26-0.6)  | 2.05E-05 | 5.45E-01 | 0.71 (0.38-1.33) | 2.89E-01 | 2.31E-01 | 0.55 (0.41-0.75) | 1.60E-04 | 3.63E-01 | 0.63 (0.32-1.1)  | 1.60E-01 | 0.327    |
| cg21566642 | not adjusted for cell count | 0.61 (0.48-0.77) | 3.88E-05 |          | 0.62 (0.47-0.83) | 1.14E-03 |          | 0.45 (0.32-0.64) | 9.97E-06 |          | 0.54 (0.32-0.9)  | 1.73E-02 |          | 0.46 (0.34-0.64) | 3.29E-06 |          | 0.54 (0.3-0.98)  | 3.94E-02 |          |
|            | adjusted for cell count     | 0.6 (0.47-0.78)  | 7.24E-05 | 4.75E-01 | 0.61 (0.46-0.83) | 1.40E-03 | 9.90E-01 | 0.46 (0.32-0.65) | 1.93E-05 | 7.68E-01 | 0.63 (0.37-1.1)  | 1.08E-01 | 2.98E-01 | 0.45 (0.32-0.63) | 3.57E-06 | 1.69E-01 | 0.49 (0.27-0.8)  | 2.27E-02 | 0.213    |
| cg05575921 | not adjusted for cell count | 0.61 (0.48-0.78) | 8.49E-05 |          | 0.67 (0.51-0.89) | 5.33E-03 |          | 0.41 (0.29-0.57) | 2.48E-07 |          | 0.37 (0.19-0.71) | 2.87E-03 |          | 0.43 (0.31-0.6)  | 4.91E-07 |          | 0.72 (0.36-1.46) | 3.69E-01 |          |
|            | adjusted for cell count     | 0.6 (0.46-0.78)  | 1.52E-04 | 4.70E-01 | 0.67 (0.5-0.9)   | 7.53E-03 | 9.96E-01 | 0.39 (0.27-0.56) | 4.36E-07 | 7.44E-01 | 0.42 (0.2-0.85)  | 1.57E-02 | 3.79E-01 | 0.43 (0.31-0.61) | 1.16E-06 | 3.60E-01 | 0.53 (0.24-1.1)  | 1.27E-01 | 0.173    |
| cg06126421 | not adjusted for cell count | 0.61 (0.49-0.75) | 2.32E-06 |          | 0.64 (0.5-0.82)  | 3.80E-04 |          | 0.48 (0.34-0.68) | 4.49E-05 |          | 0.58 (0.37-0.91) | 1.86E-02 |          | 0.65 (0.51-0.82) | 3.51E-04 |          | 0.22 (0.1-0.5)   | 3.54E-04 |          |
|            | adjusted for cell count     | 0.58 (0.46-0.73) | 4.52E-06 | 4.90E-01 | 0.62 (0.47-0.8)  | 3.54E-04 | 9.63E-01 | 0.42 (0.29-0.63) | 2.31E-05 | 3.17E-01 | 0.76 (0.44-1.34) | 3.47E-01 | 4.76E-01 | 0.6 (0.46-0.79)  | 2.77E-04 | 1.30E-01 | 0.23 (0.1-0.5)   | 6.60E-04 | 0.606    |
| cg23387569 | not adjusted for cell count | 0.67 (0.56-0.8)  | 9.51E-06 |          | 0.66 (0.54-0.82) | 1.82E-04 |          | 0.82 (0.6-1.12)  | 2.20E-01 |          | 0.76 (0.49-1.18) | 2.20E-01 |          | 0.84 (0.68-1.03) | 9.17E-02 |          | 0.54 (0.3-0.98)  | 3.94E-02 |          |
|            | adjusted for cell count     | 0.67 (0.56-0.81) | 2.08E-05 | 5.10E-01 | 0.67 (0.53-0.83) | 3.23E-04 | 1.00E+00 | 0.85 (0.61-1.18) | 3.31E-01 | 5.88E-01 | 0.95 (0.58-1.56) | 8.36E-01 | 2.50E-01 | 0.86 (0.7-1.07)  | 1.68E-01 | 2.19E-01 | 0.40 (0.27-0.6)  | 2.27E-02 | 0.213    |
| cg12312863 | not adjusted for cell count | 0.63 (0.52-0.77) | 4.00E-06 |          | 0.59 (0.46-0.75) | 1.82E-05 |          | 0.79 (0.58-1.07) | 1.21E-01 |          | 0.92 (0.64-1.33) | 6.70E-01 |          | 1.17 (0.92-1.48) | 2.04E-01 |          | 0.64 (0.35-1.1)  | 1.50E-01 |          |
|            | adjusted for cell count     | 0.61 (0.5-0.74)  | 1.29E-06 | 1.44E-01 | 0.58 (0.46-0.75) | 1.70E-05 | 9.58E-01 | 0.78 (0.57-1.07) | 1.24E-01 | 5.17E-01 | 0.96 (0.64-1.42) | 8.32E-01 | 1.00E-01 | 1.15 (0.9-1.46)  | 2.65E-01 | 1.81E-01 | 0.63 (0.32-1.1)  | 1.60E-01 | 0.327    |
| cg03636183 | not adjusted for cell count | 0.67 (0.54-0.84) | 3.63E-04 |          | 0.78 (0.62-0.98) | 3.42E-02 |          | 0.59 (0.45-0.78) | 1.97E-04 |          | 0.47 (0.29-0.78) | 3.22E-03 |          | 0.52 (0.39-0.69) | 9.70E-06 |          | 0.66 (0.68-1.16) | 1.46E-01 |          |
|            | adjusted for cell count     | 0.67 (0.53-0.84) | 5.90E-04 | 4.35E-01 | 0.78 (0.61-1)    | 4.83E-02 | 9.94E-01 | 0.6 (0.45-0.8)   | 5.38E-04 | 8.10E-01 | 0.52 (0.3-0.91)  | 2.13E-02 | 4.12E-01 | 0.5 (0.37-0.69)  | 1.80E-05 | 2.41E-01 | 0.62 (0.35-1.1)  | 1.12E-01 | 0.273    |
