# Supplementary material for: DNA methylation changes measured in pre‐diagnostic peripheral blood samples are associated with smoking and lung cancer risk
Source: PubMed Central journal article supplement (PMC5731426; doi:10.1002/ijc.30431), 2016-10-11
Supplement: IJC-140-50-s008.pdf [file IJC-140-50-s008.pdf]

**Supplementary Table 2:** distribution of cell count in MCCS and EPIC calculated with the method proposed by Houseman by smoking status and in MCCS by type of biospecimen

| <b>MCCS</b> |          | N   | CD8T %delta | CD4T %delta | NK %delta | Bcell %delta | Mono %delta | Gran %delta |
|-------------|----------|-----|-------------|-------------|-----------|--------------|-------------|-------------|
| all         |          | 734 | 0.07        | 0.21        | 0.10      | 0.09         | 0.07        | 0.51        |
| BC/Lymph    |          | 230 | 0.09        | 0.43        | 0.23      | 0.14         | 0.15        | 0.70        |
| GC          |          | 504 | 0.06        | 0.20        | 0.08      | 0.08         | 0.07        | 0.55        |
| never       |          | 86  | 0.09        | 0.43        | 0.22      | 0.10         | 0.12        | 0.20        |
| former      |          | 314 | 0.06        | 0.20        | 0.11      | 0.08         | 0.08        | 0.08        |
| current     |          | 334 | 0.07        | 0.22        | 0.10      | 0.09         | 0.08        | 0.08        |
| never       | BC/Lymph | 38  | 0.11        | 0.33        | 0.25      | 0.13         | 0.15        | 0.13        |
| former      | BC/Lymph | 92  | 0.08        | 0.22        | 0.16      | 0.09         | 0.09        | 0.30        |
| current     | BC/Lymph | 100 | 0.09        | 0.24        | 0.14      | 0.11         | 0.09        | 0.06        |
| never       | GC       | 48  | 0.07        | 0.17        | 0.20      | 0.10         | 0.09        | 0.13        |
| former      | GC       | 222 | 0.06        | 0.19        | 0.09      | 0.09         | 0.08        | 0.13        |
| current     | GC       | 234 | 0.06        | 0.21        | 0.08      | 0.09         | 0.07        | 0.07        |

| <b>EPIC</b> |  | N   | CD8T %delta | CD4T %delta | NK %delta | Bcell %delta | Mono %delta | Gran %delta |
|-------------|--|-----|-------------|-------------|-----------|--------------|-------------|-------------|
| all         |  | 376 | 0.07        | 0.21        | 0.10      | 0.09         | 0.07        | 0.51        |
| never       |  | 108 | 0.07        | 0.00        | 0.22      | 0.05         | 0.11        | 0.10        |
| former      |  | 124 | 0.07        | 0.22        | 0.10      | 0.09         | 0.07        | 0.07        |
| current     |  | 141 | 0.07        | 0.21        | 0.10      | 0.10         | 0.09        | 0.08        |
