# Supplementary material for: DNA methylation changes measured in pre‐diagnostic peripheral blood samples are associated with smoking and lung cancer risk
Source: PubMed Central journal article supplement (PMC5731426; doi:10.1002/ijc.30431), 2016-10-11
Supplement: IJC-140-50-s009.pdf [file IJC-140-50-s009.pdf]

**Supplementary Table 3:** OR of lung cancer for 1 SD methylation level in each CpG by time since blood collection overall and by smoking status. Results in the MCCS study.

| For the analysis on all subjects:   |                 | <5 years         |          | [5-10) years     |          | [10-15) years    |          | 15 years or more |          | p.het |
|-------------------------------------|-----------------|------------------|----------|------------------|----------|------------------|----------|------------------|----------|-------|
| For the analysis by smoking status: |                 | <10 years        |          | 10 years or more |          |                  |          |                  |          |       |
| TargetID                            |                 | OR (95% CI)      | p-value  | OR (95% CI)      | p-value  | OR (95% CI)      | p-value  | OR (95% CI)      | p-value  |       |
| cg05951221                          | All             | 0.58 (0.36-0.94) | 2.81E-02 | 0.74 (0.51-1.08) | 1.15E-01 | 0.68 (0.46-1)    | 4.76E-02 | 0.77 (0.44-1.34) | 3.52E-01 | 0.86  |
|                                     | Never smokers   | 0.63 (0.16-2.51) | 5.12E-01 | 0.51 (0.19-1.33) | 1.67E-01 |                  |          |                  |          | 0.81  |
|                                     | Former smokers  | 0.6 (0.35-1.04)  | 6.88E-02 | 0.58 (0.31-1.07) | 8.03E-02 |                  |          |                  |          | 0.93  |
|                                     | Current smokers | 0.86 (0.58-1.3)  | 4.79E-01 | 0.88 (0.52-1.49) | 6.37E-01 |                  |          |                  |          | 0.95  |
| cg21566642                          | All             | 0.55 (0.35-0.88) | 1.19E-02 | 0.7 (0.47-1.05)  | 8.57E-02 | 0.61 (0.41-0.9)  | 1.34E-02 | 0.47 (0.23-0.95) | 3.44E-02 | 0.73  |
|                                     | Never smokers   | 1.35 (0.46-4)    | 5.88E-01 | 0.49 (0.19-1.32) | 1.60E-01 |                  |          |                  |          | 0.17  |
|                                     | Former smokers  | 0.56 (0.32-0.96) | 3.59E-02 | 0.47 (0.23-0.97) | 4.02E-02 |                  |          |                  |          | 0.71  |
|                                     | Current smokers | 0.82 (0.5-1.32)  | 4.08E-01 | 0.62 (0.35-1.08) | 9.21E-02 |                  |          |                  |          | 0.45  |
| cg05575921                          | All             | 0.57 (0.35-0.93) | 2.51E-02 | 0.6 (0.39-0.91)  | 1.68E-02 | 0.68 (0.47-0.99) | 4.60E-02 | 0.45 (0.2-1)     | 4.97E-02 | 0.76  |
|                                     | Never smokers   | 1 (0.08-12.18)   | 1.00E+00 | 0.46 (0.13-1.62) | 2.25E-01 |                  |          |                  |          | 0.58  |
|                                     | Former smokers  | 0.46 (0.25-0.82) | 9.06E-03 | 0.74 (0.39-1.41) | 3.57E-01 |                  |          |                  |          | 0.26  |
|                                     | Current smokers | 0.72 (0.47-1.12) | 1.50E-01 | 0.74 (0.43-1.25) | 2.62E-01 |                  |          |                  |          | 0.95  |
| cg06126421                          | All             | 0.42 (0.25-0.69) | 6.54E-04 | 0.67 (0.46-0.98) | 3.83E-02 | 0.61 (0.43-0.86) | 5.02E-03 | 0.78 (0.49-1.24) | 2.92E-01 | 0.29  |
|                                     | Never smokers   | 0.69 (0.21-2.21) | 5.28E-01 | 0.36 (0.11-1.24) | 1.06E-01 |                  |          |                  |          | 0.47  |
|                                     | Former smokers  | 0.6 (0.37-0.98)  | 4.02E-02 | 0.71 (0.42-1.2)  | 2.02E-01 |                  |          |                  |          | 0.64  |
|                                     | Current smokers | 0.64 (0.41-0.99) | 4.42E-02 | 0.7 (0.48-1.03)  | 7.40E-02 |                  |          |                  |          | 0.75  |
| cg23387569                          | All             | 0.59 (0.39-0.88) | 1.02E-02 | 0.81 (0.6-1.11)  | 1.88E-01 | 0.54 (0.39-0.76) | 2.95E-04 | 0.79 (0.5-1.25)  | 3.14E-01 | 0.25  |
|                                     | Never smokers   | 0.67 (0.28-1.61) | 3.76E-01 | 0.45 (0.2-1.01)  | 5.38E-02 |                  |          |                  |          | 0.50  |
|                                     | Former smokers  | 0.42 (0.24-0.74) | 2.74E-03 | 0.53 (0.31-0.9)  | 1.84E-02 |                  |          |                  |          | 0.56  |
|                                     | Current smokers | 0.86 (0.63-1.17) | 3.46E-01 | 0.7 (0.47-1.03)  | 7.09E-02 |                  |          |                  |          | 0.41  |
| cg12312863                          | All             | 0.54 (0.36-0.83) | 4.35E-03 | 0.62 (0.44-0.89) | 9.50E-03 | 0.66 (0.49-0.9)  | 7.98E-03 | 0.76 (0.44-1.31) | 3.24E-01 | 0.79  |
|                                     | Never smokers   | 0.55 (0.2-1.49)  | 2.38E-01 | 0.64 (0.28-1.44) | 2.82E-01 |                  |          |                  |          | 0.81  |
|                                     | Former smokers  | 0.57 (0.33-0.97) | 3.77E-02 | 0.69 (0.44-1.1)  | 1.22E-01 |                  |          |                  |          | 0.57  |
|                                     | Current smokers | 0.53 (0.36-0.78) | 1.15E-03 | 0.57 (0.36-0.9)  | 1.52E-02 |                  |          |                  |          | 0.78  |
| cg03636183                          | All             | 0.73 (0.47-1.12) | 1.47E-01 | 0.66 (0.45-0.97) | 3.58E-02 | 0.72 (0.51-1.02) | 6.35E-02 | 0.49 (0.25-0.92) | 2.77E-02 | 0.71  |
|                                     | Never smokers   | 0.9 (0.31-2.57)  | 8.42E-01 | 0.64 (0.27-1.5)  | 3.03E-01 |                  |          |                  |          | 0.62  |
|                                     | Former smokers  | 0.56 (0.33-0.97) | 3.89E-02 | 0.78 (0.46-1.31) | 3.46E-01 |                  |          |                  |          | 0.38  |
|                                     | Current smokers | 0.94 (0.61-1.45) | 7.76E-01 | 0.66 (0.4-1.09)  | 1.02E-01 |                  |          |                  |          | 0.27  |
